# Supplementary material for: Self-assembled monolayers of chiral periodic mesoporous organosilica as a stimuli responsive local drug delivery system
Source: Royal Society of Chemistry journal article supplement (doi:10.1039/c8tb02507j), 2019-01-01
Supplement: c8tb02507j1.pdf [file c8tb02507j1.pdf]

## The Supporting Information

### Self Assembled Monolayers of Chiral Periodic Mesoporous Organosilica as Stimuli Responsive Local Drug Delivery System

Andisheh Motealleh<sup>a</sup>, Pooya Dorri<sup>a</sup>, and Nermin Seda Kehr<sup>\*a,b</sup>

<sup>a</sup>Physikalisches Institut and Center for Soft Nanoscience, Westfälische Wilhelms-Universität

Münster, Busso-Peus Straße 10, D-48149 Münster, Germany

<sup>b</sup>California NanoSystems Institute (CNSI), University of California-Los Angeles, Los Angeles,

CA, 90095, USA

*E-Mail:* [seda@uni-muenster.de](mailto:seda@uni-muenster.de)

**Table S1.** Quantitative amount of free PLL and PDL ( $\mu\text{g}$ ) in solution after each centrifugation (for 1 mg of the respective PMOs).

|                             | 1 <sup>st</sup> Layer<br>PSS | 2 <sup>nd</sup> Layer<br>PLL or PDL | 3 <sup>th</sup> Layer<br>PSS (mg) | 4 <sup>th</sup> Layer<br>PLL or PDL |
|-----------------------------|------------------------------|-------------------------------------|-----------------------------------|-------------------------------------|
| <sup>Hst</sup> PMO-(PSS)PLL | $0.56 \pm 0.05$              | $1.29 \pm 0.02$                     | $1.25 \pm 0.04$                   | $1.83 \pm 0.03$                     |
| <sup>Hst</sup> PMO-(PSS)PDL | $0.48 \pm 0.05$              | $1.00 \pm 0.01$                     | $1.26 \pm 0.05$                   | $1.64 \pm 0.05$                     |

**Table S2.** The quantitative amount of Hst ( $\mu\text{g}$ ) in <sup>Hst</sup>PMO-NH<sub>2</sub> and <sup>Hst</sup>PMO-(PSS)PLL/PDL (1 mg).

|     | <sup>Hst</sup> PMO-NH <sub>2</sub> | <sup>Hst</sup> PMO-(PSS)PLL | <sup>Hst</sup> PMO-(PSS)PDL |
|-----|------------------------------------|-----------------------------|-----------------------------|
| Hst | $3.1 \pm 0.01$                     | $2.1 \pm 0.01$              | $2.3 \pm 0.02$              |

**Table S3.** DLS of <sup>Hst</sup>PMO-NH<sub>2</sub> and <sup>Hst</sup>PMO-(PSS)PLL/PDL.

|                                    | Diameter (DLS, nm)<br>Water |
|------------------------------------|-----------------------------|
| <sup>Hst</sup> PMO-NH <sub>2</sub> | $287,1 \pm 10.6$            |
| <sup>Hst</sup> PMO-(PSS)PLL        | $540.8 \pm 3.2$             |
| <sup>Hst</sup> PMO-(PSS)PDL        | $527,1 \pm 2.9$             |

**Table S4.** Zeta potential value of <sup>Hst</sup>PMO-NH<sub>2</sub> with PSS and PLL/PDL.

| coating layer                      | ZP, mV                           |
|------------------------------------|----------------------------------|
| <sup>Hst</sup> PMO-NH <sub>2</sub> | $42.1 \pm 1.4$                   |
| 1st layer (PSS)                    | $-31.5 \pm 1.7 / -42.07 \pm 0.2$ |
| 2nd layer (PLL/PDL)                | $26.3 \pm 0.06 / 33.2 \pm 0.9$   |
| 3th layer (PSS)                    | $-31.4 \pm 1.5 / -43.4 \pm 2.1$  |
| 4th layer (PLL/PDL)                | $38.9 \pm 0.7 / 41.3 \pm 2.1$    |

**Table S5.** Zeta potential value of  $\text{DOX}^{\text{PMO-NH}_2}$  with PSS and PLL/PDL.

| coating layer                  | ZP, mV                          |
|--------------------------------|---------------------------------|
| $\text{DOX}^{\text{PMO-NH}_2}$ | $41.1 \pm 1.8$                  |
| 1st layer (PSS)                | $-39.9 \pm 2.7/ -32.06 \pm 0.3$ |
| 2nd layer (PLL/PDL)            | $25.2 \pm 0.6/ 25.06 \pm 1.4$   |
| 3th layer (PSS)                | $-37.3 \pm 1.2/ -34.01 \pm 1.7$ |
| 4th layer (PLL/PDL)            | $32.33 \pm 0.5/ 33.1 \pm 0.6$   |

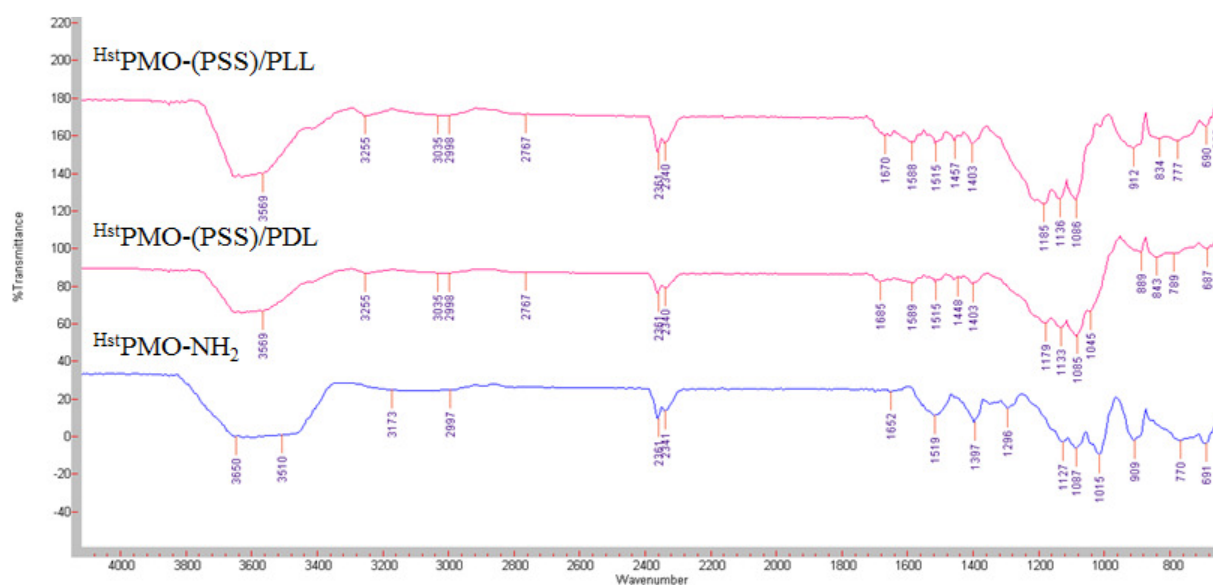

**Figure S1.** IR spectra of  $\text{HstPMO-NH}_2$ ,  $\text{HstPMO-(PSS)PDL}$ , and  $\text{HstPMO-(PSS)PLL}$ .

**Table S6.** The amount of Hst ( $\mu\text{g/ml}$ ) released from  $\text{HstPMO-NH}_2$ ,  $\text{HstPMO-(PSS)/PDL}$ , and  $\text{HstPMO-(PSS)/PLL}$  over different time intervals at pH 7.4 and pH 6.0 (N=6).

|                | <b>HstPMO-NH<sub>2</sub><br/>pH 7.4</b> | <b>HstPMO-NH<sub>2</sub><br/>pH 6</b> | <b>HstPMO-(PSS)/PLL<br/>pH 7.4</b> | <b>HstPMO-(PSS)/PLL<br/>pH 6</b> | <b>HstPMO-(PSS)/PDL<br/>pH 7.4</b> | <b>HstPMO-(PSS)/PDL<br/>pH 6</b> |
|----------------|-----------------------------------------|---------------------------------------|------------------------------------|----------------------------------|------------------------------------|----------------------------------|
| <b>3 min</b>   | 0.51 $\pm$ 0.07                         | 0.68 $\pm$ 0.10                       | 0.01 $\pm$ 0.01                    | 0.11 $\pm$ 0.01                  | 0.02 $\pm$ 0.005                   | 0.11 $\pm$ 0.003                 |
| <b>15 min</b>  | 0.60 $\pm$ 0.08                         | 0.91 $\pm$ 0.11                       | 0.03 $\pm$ 0.01                    | 0.25 $\pm$ 0.02                  | 0.05 $\pm$ 0.01                    | 0.24 $\pm$ 0.01                  |
| <b>30 min</b>  | 0.66 $\pm$ 0.09                         | 1.12 $\pm$ 0.12                       | 0.15 $\pm$ 0.02                    | 0.46 $\pm$ 0.03                  | 0.10 $\pm$ 0.02                    | 0.37 $\pm$ 0.03                  |
| <b>1 h</b>     | 0.71 $\pm$ 0.10                         | 1.28 $\pm$ 0.13                       | 0.31 $\pm$ 0.03                    | 0.67 $\pm$ 0.04                  | 0.15 $\pm$ 0.03                    | 0.51 $\pm$ 0.05                  |
| <b>2 h</b>     | 0.74 $\pm$ 0.11                         | 1.41 $\pm$ 0.14                       | 0.39 $\pm$ 0.03                    | 0.88 $\pm$ 0.04                  | 0.19 $\pm$ 0.04                    | 0.66 $\pm$ 0.06                  |
| <b>3 h</b>     | 0.75 $\pm$ 0.12                         | 1.56 $\pm$ 0.15                       | 0.47 $\pm$ 0.04                    | 1.09 $\pm$ 0.05                  | 0.24 $\pm$ 0.05                    | 0.79 $\pm$ 0.07                  |
| <b>4 h</b>     | 0.77 $\pm$ 0.12                         | 1.71 $\pm$ 0.15                       | 0.52 $\pm$ 0.05                    | 1.13 $\pm$ 0.06                  | 0.36 $\pm$ 0.07                    | 0.85 $\pm$ 0.08                  |
| <b>5 h</b>     | 0.80 $\pm$ 0.13                         | 1.89 $\pm$ 0.16                       | 0.55 $\pm$ 0.06                    | 1.18 $\pm$ 0.06                  | 0.41 $\pm$ 0.08                    | 0.90 $\pm$ 0.09                  |
| <b>7 h</b>     | 0.82 $\pm$ 0.13                         | 2.07 $\pm$ 0.17                       | 0.58 $\pm$ 0.06                    | 1.23 $\pm$ 0.07                  | 0.45 $\pm$ 0.08                    | 0.96 $\pm$ 0.09                  |
| <b>1 day</b>   | 1.34 $\pm$ 0.16                         | 2.17 $\pm$ 0.17                       | 0.63 $\pm$ 0.07                    | 1.40 $\pm$ 0.08                  | 0.51 $\pm$ 0.10                    | 1.02 $\pm$ 0.10                  |
| <b>2 days</b>  | 1.37 $\pm$ 0.17                         | 2.37 $\pm$ 0.17                       | 0.69 $\pm$ 0.08                    | 1.49 $\pm$ 0.09                  | 0.56 $\pm$ 0.11                    | 1.08 $\pm$ 0.10                  |
| <b>3 days</b>  | 1.41 $\pm$ 0.18                         | 2.45 $\pm$ 0.20                       | 0.74 $\pm$ 0.09                    | 1.57 $\pm$ 0.09                  | 0.62 $\pm$ 0.13                    | 1.14 $\pm$ 0.11                  |
| <b>7 days</b>  | 1.45 $\pm$ 0.20                         | 2.54 $\pm$ 0.21                       | 0.87 $\pm$ 0.09                    | 1.71 $\pm$ 0.10                  | 0.67 $\pm$ 0.13                    | 1.35 $\pm$ 0.12                  |
| <b>14 days</b> | 1.62 $\pm$ 0.20                         | 2.67 $\pm$ 0.22                       | 1.00 $\pm$ 0.10                    | 1.90 $\pm$ 0.11                  | 0.74 $\pm$ 0.14                    | 1.41 $\pm$ 0.12                  |
| <b>30 days</b> | 1.63 $\pm$ 0.21                         | 2.68 $\pm$ 0.22                       | 1.01 $\pm$ 0.11                    | 1.91 $\pm$ 0.12                  | 0.74 $\pm$ 0.14                    | 1.43 $\pm$ 0.12                  |

**Table S7.** The surface coverage (%), surface roughness [Ra (nm)], and water contact angle (°) of the SAMs of <sup>Hst</sup>PMO-NH<sub>2</sub> and <sup>Hst</sup>PMO-PSS/PDL(PLL).

|                           | <b>Glass</b> | <b><sup>Hst</sup>PMO-NH<sub>2</sub></b> | <b><sup>Hst</sup>PMO-(PSS)PLL</b> | <b><sup>Hst</sup>PMO-(PSS)PDL</b> |
|---------------------------|--------------|-----------------------------------------|-----------------------------------|-----------------------------------|
| Surface coverage (%)      | 0            | 95.4 ± 1.6                              | 96.1 ± 2.1                        | 96.8 ± 1.3                        |
| Average roughness Ra (nm) | 150 ± 30     | 230 ± 30                                | 390 ± 10                          | 350 ± 30                          |
| Water contact angle (°)   | 91.8 ± 5.9   | 62.7 ± 2.4                              | 55.2 ± 0.9                        | 49.4 ± 8.2                        |

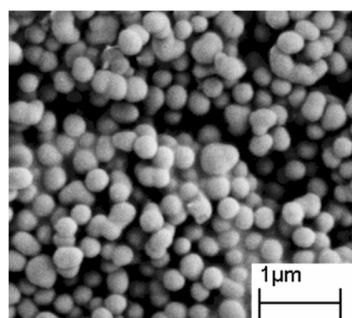

**Figure S2.** SEM image of PMO-NH<sub>2</sub> after 30 days in cell culture media.

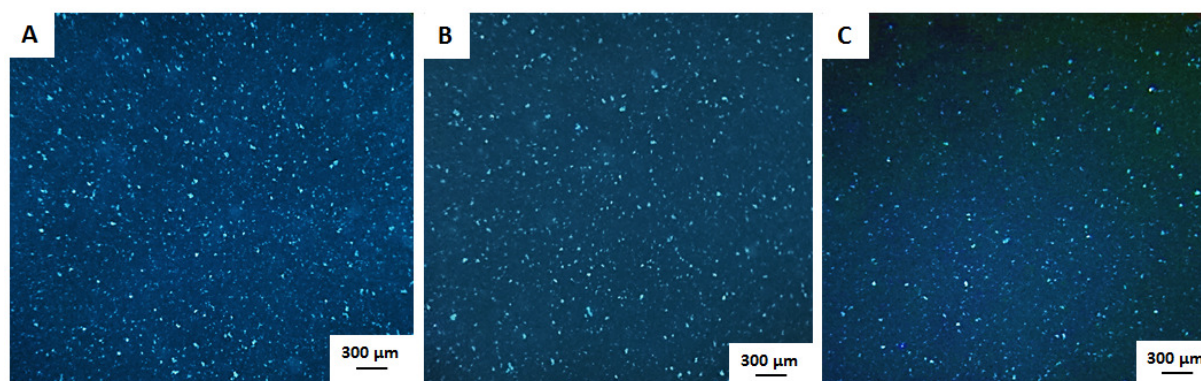

**Figure S3.** The fluorescence microscopy images of blue emitting Hst dye loaded SAMs of  $\text{HstPMO-NH}_2$  **A.**  $\text{HstPMO-(PSS)PLL}$  **B.** and  $\text{HstPMO-(PSS)PDL}$  **C.** on glass substrate .

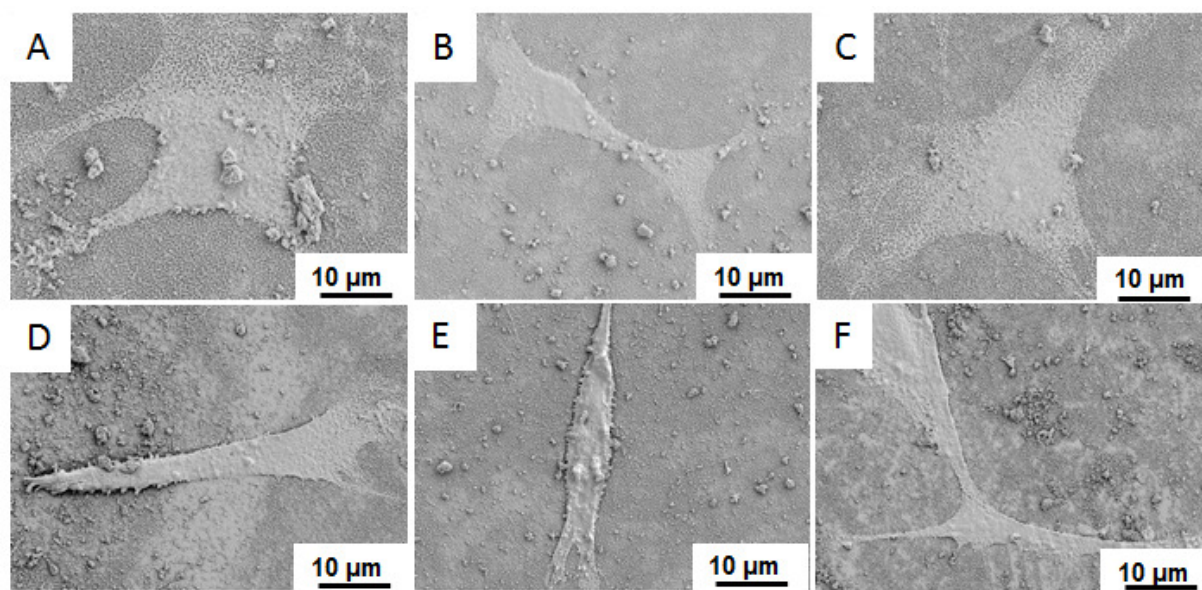

**Figure S4.** SEM images of 3T3 (A-C) and fibroblast (D-F) cells on the SAMs of  $\text{HstPMO-NH}_2$  (A, D),  $\text{HstPMO-(PSS)PLL}$  (B, E), and  $\text{HstPMO-(PSS)PDL}$  (C, F).

**Table S8.** The amount of DOX. ( $\mu\text{g/ml}$ ) released from  $\text{DoxPMO-NH}_2$ ,  $\text{DoxPMO-(PSS)/PLL}$  in different time periods at pH 7.4 and 6.0.

|                | <b>DoxPMO-NH<sub>2</sub><br/>pH 7.4</b> | <b>DoxPMO-NH<sub>2</sub><br/>pH 6</b> | <b>DoxPMO-(PSS)/PLL<br/>pH 7.4</b> | <b>DoxPMO-(PSS)/PLL<br/>pH 6</b> | <b>DoxPMO-(PSS)/PDL<br/>pH 7.4</b> | <b>DoxPMO-(PSS)/PDL<br/>pH 6</b> |
|----------------|-----------------------------------------|---------------------------------------|------------------------------------|----------------------------------|------------------------------------|----------------------------------|
| <b>3 min</b>   | 1.37 $\pm$ 0.07                         | 4.19 $\pm$ 0.09                       | 0.91 $\pm$ 0.01                    | 1.48 $\pm$ 0.01                  | 0.06 $\pm$ 0.002                   | 0.29 $\pm$ 0.01                  |
| <b>15 min</b>  | 2.82 $\pm$ 0.07                         | 7.15 $\pm$ 0.13                       | 1.86 $\pm$ 0.38                    | 3.07 $\pm$ 0.13                  | 0.10 $\pm$ 0.01                    | 0.73 $\pm$ 0.01                  |
| <b>30 min</b>  | 4.27 $\pm$ 0.12                         | 10.11 $\pm$ 0.20                      | 2.73 $\pm$ 0.56                    | 4.67 $\pm$ 0.22                  | 0.13 $\pm$ 0.02                    | 1.80 $\pm$ 0.04                  |
| <b>1 h</b>     | 5.85 $\pm$ 0.14                         | 11.85 $\pm$ 0.25                      | 3.56 $\pm$ 0.76                    | 6.27 $\pm$ 0.27                  | 0.22 $\pm$ 0.01                    | 2.85 $\pm$ 0.01                  |
| <b>2 h</b>     | 7.35 $\pm$ 0.18                         | 13.52 $\pm$ 0.34                      | 4.52 $\pm$ 0.80                    | 7.88 $\pm$ 0.32                  | 0.32 $\pm$ 0.01                    | 3.88 $\pm$ 0.01                  |
| <b>3 h</b>     | 8.83 $\pm$ 0.20                         | 16.40 $\pm$ 0.41                      | 5.35 $\pm$ 1.10                    | 9.52 $\pm$ 0.37                  | 0.44 $\pm$ 0.01                    | 5.32 $\pm$ 0.01                  |
| <b>4 h</b>     | 10.40 $\pm$ 0.24                        | 18.13 $\pm$ 0.46                      | 6.19 $\pm$ 1.19                    | 11.17 $\pm$ 0.43                 | 0.54 $\pm$ 0.01                    | 5.62 $\pm$ 0.004                 |
| <b>5 h</b>     | 11.93 $\pm$ 0.26                        | 19.61 $\pm$ 0.50                      | 7.01 $\pm$ 1.34                    | 12.78 $\pm$ 0.49                 | 0.83 $\pm$ 0.01                    | 6.78 $\pm$ 0.01                  |
| <b>7 h</b>     | 13.36 $\pm$ 0.33                        | 21.04 $\pm$ 0.54                      | 7.77 $\pm$ 1.42                    | 14.38 $\pm$ 0.55                 | 1.98 $\pm$ 0.006                   | 7.92 $\pm$ 0.01                  |
| <b>1 day</b>   | 14.81 $\pm$ 0.39                        | 22.54 $\pm$ 0.57                      | 9.04 $\pm$ 1.70                    | 15.81 $\pm$ 0.63                 | 3.14 $\pm$ 0.01                    | 9.14 $\pm$ 0.01                  |
| <b>2 days</b>  | 16.14 $\pm$ 0.43                        | 24.43 $\pm$ 0.64                      | 10.02 $\pm$ 1.76                   | 17.22 $\pm$ 0.67                 | 4.28 $\pm$ 0.01                    | 10.28 $\pm$ 0.01                 |
| <b>3 days</b>  | 17.58 $\pm$ 0.46                        | 25.92 $\pm$ 0.66                      | 11.06 $\pm$ 1.83                   | 18.80 $\pm$ 0.68                 | 4.47 $\pm$ 0.001                   | 11.71 $\pm$ 0.03                 |
| <b>7 days</b>  | 18.48 $\pm$ 0.88                        | 27.32 $\pm$ 1.28                      | 11.61 $\pm$ 2.08                   | 19.82 $\pm$ 1.15                 | 5.42 $\pm$ 0.02                    | 12.14 $\pm$ 0.03                 |
| <b>14 days</b> | 19.28 $\pm$ 1.15                        | 31.04 $\pm$ 2.95                      | 12.53 $\pm$ 2.23                   | 21.48 $\pm$ 1.28                 | 6.38 $\pm$ 0.02                    | 12.74 $\pm$ 0.01                 |
| <b>30 days</b> | 20.34 $\pm$ 1.18                        | 32.38 $\pm$ 3.00                      | 13.39 $\pm$ 2.36                   | 22.79 $\pm$ 1.31                 | 7.80 $\pm$ 0.07                    | 13.34 $\pm$ 0.05                 |

**Table S9.** The quantitative numbers ( $\times 10^3$ ) of alive fibroblasts, 3T3 cells, and Colo 818 cells and cell viability (in parenthesis) that were adhered onto  $\text{DOX}^{\text{PMO-NH}_2}$ ,  $\text{DOX}^{\text{PMO-(PSS)/PLL}}$  and  $\text{DOX}^{\text{PMO-(PSS)/PDL}}$  at different time points.

| Time           | $\text{DOX}^{\text{PMO-NH}_2}$<br>Fibroblast | $\text{DOX}^{\text{PMO-NH}_2}$<br>3T3 | $\text{DOX}^{\text{PMO-NH}_2}$<br>Colo | $\text{DOX}^{\text{PMO-PSS/PLL}}$<br>Fibroblast | $\text{DOX}^{\text{PMO-PSS/PLL}}$<br>3T3 | $\text{DOX}^{\text{PMO-PSS/PLL}}$<br>Colo | $\text{DOX}^{\text{PMO-PSS/PDL}}$<br>Fibroblast | $\text{DOX}^{\text{PMO-PSS/PDL}}$<br>3T3 | $\text{DOX}^{\text{PMO-PSS/PDL}}$<br>Colo |
|----------------|----------------------------------------------|---------------------------------------|----------------------------------------|-------------------------------------------------|------------------------------------------|-------------------------------------------|-------------------------------------------------|------------------------------------------|-------------------------------------------|
| <b>30 min</b>  | 13.3±1.5<br>(89%±9.4)                        | 15.0±1.7<br>(90%±9)                   | 15.0±1.0<br>(90%±9)                    | 15.0±1.0<br>(92%±9)                             | 13.8±1.1<br>(92%±9)                      | 13.8±1.0<br>(85%±15)                      | 16.3±0.6<br>(96%±13)                            | 13.8±0.6<br>(96%±11)                     | 15.0±1.0<br>(95%±12)                      |
| <b>2 h</b>     | 11.7±0.6<br>(78%±14)                         | 10.0±1.0<br>(67%±10)                  | 8.3±1.1<br>(63%±12)                    | 13.8±0.6<br>(85%±13)                            | 13.3±1.5<br>(80%±11)                     | 13.3±1.1<br>(73%±6)                       | 13.8±1.1<br>(85%±19)                            | 13.3±0.6<br>(84%±4)                      | 13.8±1.1<br>(81%±12)                      |
| <b>4 h</b>     | 10±1<br>(67%±10)                             | 8.3±0.6<br>(56%±8)                    | 6.7±0.6<br>(50%±7)                     | 15±1.1<br>(75%±14)                              | 13.8±0.6<br>(73%±14)                     | 13.3±0.6<br>(73%±16)                      | 15±1<br>(80%±14)                                | 15±0.6<br>(77%±3)                        | 13.8±0.6<br>(76%±3)                       |
| <b>7 h</b>     | 8.3±0.6<br>(63%±8)                           | 6.7±1.1<br>(50%±18)                   | 5.0±1.0<br>(43%±20)                    | 17.5±0.6<br>(74%±5)                             | 16.3±0.6<br>(68%±6)                      | 15.0±1.0<br>(64%±10)                      | 18.3±0.6<br>(79%±3)                             | 16.7±0.6<br>(74%±10)                     | 16.3±0.6<br>(74%±10)                      |
| <b>1 day</b>   | 11.7±0.6<br>(58%±7)                          | 5.0±1.0<br>(38%±14)                   | 3.3±0.6<br>(33%±16)                    | 18.3±1.1<br>(65%±3)                             | 17.5±0.6<br>(61%±3)                      | 16.3±0.6<br>(56%±4)                       | 18.8±0.6<br>(65%±3)                             | 17.5±0.6<br>(61%±6)                      | 17.5±0.6<br>(58%±3)                       |
| <b>2 days</b>  | 10.0±1.0<br>(50%±11)                         | 3.75±0.6<br>(33%±15)                  | 2.5±0.6<br>(29%±12)                    | 18.8±0.5<br>(58%±4)                             | 18.3±0.6<br>(55%±3)                      | 17.5±0.6<br>(52%±3)                       | 20.0±0.8<br>(64%±10)                            | 18.8±0.5<br>(58%±2)                      | 18.3±0.6<br>(56%±5)                       |
| <b>3 days</b>  | 8.3±0.6<br>(45%±8)                           | 2.5±0.6<br>(29%±15)                   | 1.25±0.6<br>(17%±14)                   | 20.0±0.8<br>(57%±2)                             | 18.8±0.5<br>(48%±3)                      | 18.3±0.6<br>(46%±3)                       | 21.3±0.5<br>(61%±5)                             | 20.0±0.8<br>(52%±7)                      | 20.0±0.8<br>(48%±8)                       |
| <b>7 days</b>  | 6.7±0.6<br>(33%±6)                           | 1.25±0.5<br>(17%±8)                   | 1.25±0.6<br>(11%±6)                    | 21.3±0.5<br>(53%±0.7)                           | 20.0±0.8<br>(46%±4)                      | 18.8±0.5<br>(45%±5)                       | 22.5±0.6<br>(58%±6)                             | 21.3±0.5<br>(50%±2)                      | 20.0±1.0<br>(46%±6)                       |
| <b>14 days</b> | 5.0±0.8<br>(23%±8)                           | 1.0±0.4<br>(10%±1)                    | 1.0±0.4<br>(8%±1)                      | 22.5±0.6<br>(46%±2)                             | 21.3±0.5<br>(39%±4)                      | 20.0±0.8<br>(36%±4)                       | 23.8±0.5<br>(53%±3)                             | 22.5±0.6<br>(47%±3)                      | 21.3±1.0<br>(44%±5)                       |

**Table S10.** The amount of Dox ( $\mu\text{g}$ ) internalized by the fibroblasts, 3T3 cells and Colo 818 cells that were adhered onto  $\text{DOX}^{\text{PMO-NH}_2}$ ,  $\text{DOX}^{\text{PMO-(PSS)/PLL}}$  and  $\text{DOX}^{\text{PMO-(PSS)/PDL}}$  at different time points.

| Time           | $\text{DOX}^{\text{PMO-NH}_2}$<br>in<br>Fibroblast<br>cells | $\text{DOX}^{\text{PMO-NH}_2}$<br>in<br>3T3<br>cells | $\text{DOX}^{\text{PMO-NH}_2}$<br>in<br>Colo<br>cells | $\text{DOX}^{\text{PMO-PSS/PLL}}$<br>in<br>Fibroblast<br>cells | $\text{DOX}^{\text{PMO-PSS/PLL}}$<br>in<br>3T3<br>cells | $\text{DOX}^{\text{PMO-PSS/PLL}}$<br>in<br>Colo 818<br>cells | $\text{DOX}^{\text{PMO-PSS/PDL}}$<br>in<br>Fibroblast<br>cells | $\text{DOX}^{\text{PMO-PSS/PDL}}$<br>in<br>3T3<br>cells | $\text{DOX}^{\text{PMO-PSS/PDL}}$<br>in<br>Colo 818<br>cells |
|----------------|-------------------------------------------------------------|------------------------------------------------------|-------------------------------------------------------|----------------------------------------------------------------|---------------------------------------------------------|--------------------------------------------------------------|----------------------------------------------------------------|---------------------------------------------------------|--------------------------------------------------------------|
| <b>30 min</b>  | 0.83±0.02                                                   | 0.88±0.04                                            | 0.93±0.007                                            | 0.66±0.02                                                      | 0.86±0.02                                               | 0.87±0.02                                                    | 0.43±0.02                                                      | 0.82±0.02                                               | 0.82±0.01                                                    |
| <b>2 h</b>     | 0.85±0.01                                                   | 0.96±0.01                                            | 0.97±0.009                                            | 0.69±0.004                                                     | 0.88±0.04                                               | 0.88±0.04                                                    | 0.46±0.005                                                     | 0.84±0.01                                               | 0.85±0.007                                                   |
| <b>4 h</b>     | 0.93±0.03                                                   | 1.00±0.01                                            | 1.01±0.01                                             | 0.73±0.004                                                     | 0.93±0.03                                               | 0.98±0.01                                                    | 0.47±0.003                                                     | 0.89±0.03                                               | 0.90±0.005                                                   |
| <b>7 h</b>     | 0.97±0.007                                                  | 1.01±0.07                                            | 1.02±0.008                                            | 0.74±0.01                                                      | 0.97±0.01                                               | 0.98±0.008                                                   | 0.48±0.006                                                     | 0.94±0.003                                              | 0.95±0.02                                                    |
| <b>1 day</b>   | 1.25±0.02                                                   | 1.72±0.01                                            | 1.89±0.007                                            | 0.76±0.008                                                     | 1.27±0.002                                              | 1.37±0.01                                                    | 0.51±0.02                                                      | 1.01±0.01                                               | 1.02±0.01                                                    |
| <b>2 days</b>  | 1.28±0.008                                                  | 1.75±0.02                                            | 1.90±0.01                                             | 0.78±0.01                                                      | 1.31±0.008                                              | 1.41±0.01                                                    | 0.59±0.02                                                      | 1.02±0.005                                              | 1.05±0.006                                                   |
| <b>3 days</b>  | 1.31±0.002                                                  | 1.82±0.005                                           | 1.91±0.03                                             | 0.81±0.01                                                      | 1.38±0.02                                               | 1.45±0.006                                                   | 0.61±0.005                                                     | 1.04±0.008                                              | 1.08±0.008                                                   |
| <b>7 days</b>  | 1.39±0.027                                                  | 1.83±0.007                                           | 2.09±0.007                                            | 0.84±0.008                                                     | 1.40±0.02                                               | 1.47±0.03                                                    | 0.63±0.002                                                     | 1.07±0.01                                               | 1.10±0.006                                                   |
| <b>14 days</b> | 1.41±0.03                                                   | 1.87±0.01                                            | 2.11±0.01                                             | 0.88±0.01                                                      | 1.43±0.007                                              | 1.50±0.03                                                    | 0.66±0.002                                                     | 1.12±0.02                                               | 1.17±0.02                                                    |
